# Supplementary material for: Monooxygenase-catalyzed regioselective hydroxylation for the synthesis of hydroxyequols
Source: Royal Society of Chemistry journal article supplement (doi:10.1039/c9ra03913a), 2019-01-01
Supplement: c9ra03913a1.pdf [file c9ra03913a1.pdf]

Electric supplementary information (ESI)

## **Monoxygenase-catalyzed regioselective hydroxylation for the synthesis of hydroxyequols**

Takafumi Hashimoto,<sup>a</sup> Daiki Nozawa,<sup>a</sup> Katsuyuki Mukai,<sup>b</sup> Akinobu Matsuyama,<sup>b</sup> Kouji Kuramochi<sup>a</sup> and Toshiki Furuya<sup>\*a</sup>

### **Experimental details**

#### Chemicals

(*S*)-Equol and (*R*)-equol were purchased from Wako Pure Chemicals (Osaka, Japan). Tween 80 was purchased from MP Biomedicals (Illkirch, France). All other chemicals were of analytical grade.

#### Construction of expression plasmids

A BLAST search of the genome sequences was performed with the amino acid sequence of HpaB of *Pseudomonas aeruginosa* PAO1 (HpaB<sub>pa</sub>). The genome sequence of *Photorhabdus luminescens* subsp. *laumondii* TTO1 contains three *hpaB* homologues, *hpaB*<sub>pl-1</sub>, *hpaB*<sub>pl-2</sub>, and *hpaB*<sub>pl-3</sub> (Table S1). The genome sequence of *Rhodococcus opacus* B-4 contains three *hpaB* homologues, *hpaB*<sub>ro-1</sub>, *hpaB*<sub>ro-2</sub>, and *hpaB*<sub>ro-3</sub> (Table S1). These genes were amplified by PCR and then inserted into the pETDuet-1 vector using the primers and restriction enzymes listed in Table S1. The *hpaB* gene of *Escherichia coli* BL21(DE3) (*hpaB*<sub>ec</sub>) was also cloned (Table S1). The *hpaB*<sub>pa</sub> gene of *P. aeruginosa* PAO1 was previously cloned to construct the pETDhpaB plasmid.<sup>1</sup> The *hpaC* gene of *P.*

*aeruginosa* PAO1 (*hpaC<sub>pa</sub>*) was amplified from the previously constructed pETDhpaBC plasmid by PCR and then inserted into the pCDFDuet-1 vector using the primers and restriction enzymes listed in [Table S1](#).<sup>1</sup>

#### Preparation of whole cells

The pETDuet-1 vector carrying each *hpaB* homologue and the pCDFDuet-1 vector carrying *hpaC<sub>pa</sub>* were introduced into *E. coli* BL21 Star (DE3) cells (Invitrogen, Carlsbad, CA, USA). The transformed *E. coli* cells were cultivated at 30°C in LB medium containing (per liter) Bacto tryptone (10 g), Bacto yeast extract (5 g), and NaCl (10 g) (pH 7.0), supplemented with ampicillin (50 µg mL<sup>-1</sup>) and streptomycin (50 µg mL<sup>-1</sup>). After cultivation for 6 h (OD<sub>600</sub>=0.8–1.0), isopropyl-β-D-thiogalactopyranoside (1 mM) was added to the medium and cultivation was continued for an additional 15 h at 25°C. Cells were harvested by centrifugation and were washed with potassium phosphate buffer (50 mM, pH 7.5) containing glycerol (10% v/v). These cells were used for whole-cell reactions.

The *hpaB<sub>pl-1</sub>* gene was also co-expressed with the chaperonin GroEL and the cochaperonin GroES in *E. coli* cells. The pGro7 plasmid (Takara Bio, Tokyo, Japan) was used for the co-expression of GroEL and GroES, as described previously.<sup>2</sup> The pETDuet-1 vector carrying *hpaB<sub>pl-1</sub>*, the pCDFDuet-1 vector carrying *hpaC<sub>pa</sub>*, and pGro7 were introduced into *E. coli* BL21 Star (DE3) cells. The transformed *E. coli* cells were cultivated at 30°C in LB medium supplemented with ampicillin (50 µg mL<sup>-1</sup>), streptomycin (50 µg mL<sup>-1</sup>), chloramphenicol (30 µg mL<sup>-1</sup>), and arabinose (4 mg mL<sup>-1</sup>). After cultivation for 6 h (OD<sub>600</sub>=0.8–1.0), isopropyl-β-D-thiogalactopyranoside (1 mM) was added to the medium and cultivation was continued for an additional 15 h at 15°C.

### Reactions using whole cells

The reaction mixture (250  $\mu$ L) contained cells of transformed *E. coli* strain (50 g of wet cell weight per liter), (*S*)-equol or (*R*)-equol (10 mM), dimethylsulfoxide (4% v/v), Tween 80 (1.5% v/v), and potassium phosphate buffer (200 mM, pH 7.5) containing glycerol (10% v/v). The reactions were carried out at 30°C with vigorous shaking using a microtube shaker.

### Reactions on a flask scale

The reaction was carried out in a 500-mL flask containing cells of transformed *E. coli* strain (collected from 400 mL culture broth), (*S*)-equol (5 or 10 mM) or (*R*)-equol (5 or 10 mM), dimethylsulfoxide (4% v/v), Tween 80 (1.5% v/v), and potassium phosphate buffer (200 mM, pH 7.5) containing glycerol (10% v/v) in a volume of 20 mL. The reactions were carried out at 30°C with reciprocal shaking using a flask shaker.

### Product analysis

High-performance liquid chromatography (HPLC) analysis was performed using an LC-20 system (Shimadzu, Kyoto, Japan) with an XTerra MS C18 IS column (4.6 $\times$ 20 mm; particle size, 3.5  $\mu$ m; Waters, Milford, MA, USA). The reaction mixture (250  $\mu$ L) was acidified by the addition of HCl (pH 2–3), and methanol (500  $\mu$ L) and water (250  $\mu$ L) were then added. The solution was vigorously shaken and centrifuged. The resulting supernatant (10  $\mu$ L) was injected into the HPLC system. Mobile phases A and B were composed of 0.1% formic acid in water and of methanol, respectively. The mobile phase B was programmed as follows: start ratio of 5%, held at 5% for 3 min, increased to 40% for 1 min, increased to 80% for 10 min by a linear gradient, increased to 100% for 1 min, and held at 100% for 3 min. The flow rate was 0.5 mL min<sup>-1</sup>. Compounds

were detected spectrophotometrically at a wavelength of 220 nm. The amounts of (*S*)-equol and (*R*)-equol were calculated from standard calibration curves that were made using the compounds purchased from Wako Pure Chemicals. The reaction products, 3'- and 6-hydroxyequols, were purified using column chromatography. The reaction mixture was acidified by the addition of HCl (pH 2–3) and extracted with ethyl acetate. After evaporation of the extract, the resulting residue was applied to a silica gel column (Wakogel 60N, 38–100  $\mu\text{m}$ , Wako Pure Chemicals) and eluted with hexane/ethyl acetate. After evaporation of the fractions containing the product, the resulting residue was then applied to a C18 column (Cosmosil 75C18-OPN, Nacalai Tesque) and eluted with methanol/water. The amounts of 3'- and 6-hydroxyequols were calculated from standard calibration curves that were made using the compounds isolated in this study. Mass analysis was performed using a Thermo Finnigan LCQ (Waltham, MA, USA) with an electrospray ionization, as described previously.<sup>3</sup> Nuclear magnetic resonance (NMR) analysis was performed using a Bruker Spectrospin 400 (Billerica, MA, USA), as described previously.<sup>3</sup>

3'-Hydroxyequol: <sup>1</sup>H NMR (400 MHz, methanol-*d*<sub>4</sub>):  $\delta$ =2.75 (m, 2H, H-4), 2.90 (m, 1H, H-3), 3.79 (m, 1H, H-2), 4.10 (m, 1H, H-2), 6.13 (d, *J*=2.4 Hz, 1H, H-8), 6.22 (dd, *J*=8.2, 2.4 Hz, 1H, H-6), 6.50 (dd, *J*=8.1, 2.0 Hz, 1H, H-6'), 6.60 (d, *J*=2.0 Hz, 1H, H-2'), 6.63 (d, *J*=8.1 Hz, 1H, H-5'), 6.78 (d, *J*=8.2 Hz, 1H, H-5); <sup>13</sup>C NMR (400 MHz, methanol-*d*<sub>4</sub>):  $\delta$ =33.1 (C-4), 39.6 (C-3), 72.3 (C-2), 103.8 (C-8), 109.1 (C-6), 114.6 (C-4a), 115.4 (C-2'), 116.5 (C-5'), 119.6 (C-6'), 131.2 (C-5), 134.7 (C-1'), 145.2 (C-4'), 146.5 (C-3'), 156.3 (C-8a), 157.6 (C-7); MS (ESI) (*m/z*): calculated for C<sub>15</sub>H<sub>13</sub>O<sub>4</sub> [M-H]<sup>-</sup>: 257.0814, found: 257.0815.

6-Hydroxyequol:  $^1\text{H}$  NMR (400 MHz, methanol- $d_4$ ):  $\delta$ =2.79 (m, 2H, H-4), 3.02 (m, 1H, H-3), 3.84 (m, 1H, H-2), 4.12 (m, 1H, H-2), 6.24 (s, 1H, H-8), 6.48 (s, 1H, H-5), 6.73 (dd,  $J$ =6.6, 2.0 Hz, 2H, H-3'), 7.06 (dd,  $J$ =6.6, 1.8 Hz, 2H, H-2');  $^{13}\text{C}$  NMR (400 MHz, methanol- $d_4$ ):  $\delta$ =33.2 (C-4), 39.6 (C-3), 72.1 (C-2), 104.4 (C-8), 113.8 (C-4a), 116.4 (C-3'), 116.6 (C-5), 129.4 (C-2'), 134.1 (C-1'), 140.1 (C-6), 145.5 (C-7), 148.7 (C-8a), 157.3 (C-4'); MS (ESI) (m/z): calculated for  $\text{C}_{15}\text{H}_{13}\text{O}_4$  [M-H] $^-$ : 257.0814, found: 257.0816.

## References

- 1 T. Furuya and K. Kino, *Appl. Microbiol. Biotechnol.*, 2014, **98**, 1145-11542.
- 2 T. Furuya, M. Miura and K. Kino, *ChemBioChem*, 2014, **15**, 2248-2254.
- 3 T. Furuya and K. Kino, *ChemSusChem*. 2008, **2**, 645-649.

**Table S1** Genes used in this study and primer sequences for gene cloning.

| Gene                       | Accession no. <sup>a</sup> | Primer sequence (5' to 3') <sup>b</sup>                              | Digestion <sup>c</sup> |
|----------------------------|----------------------------|----------------------------------------------------------------------|------------------------|
| <i>hpaB<sub>pl-1</sub></i> | CAE12541                   | GAATTC <b><u>CATG</u></b> T <b>CAG</b> AAAAACATGAAACAAAAAT (forward) | PciI                   |
|                            |                            | CGCGGATCC <b>T</b> AGCGGTTGGAAGGCCAAAT (reverse)                     | BamHI                  |
| <i>hpaB<sub>pl-2</sub></i> | CAE13270                   | TT <b>CATG</b> AAACCAGAAGATTTTCGCGCCG (forward)                      | BspHI                  |
|                            |                            | CGCGGATCC <b>T</b> TATTT <b>CAG</b> CAGCTTATCTAA (reverse)           | BamHI                  |
| <i>hpaB<sub>pl-3</sub></i> | CAE16399                   | TT <b>CATG</b> AAACCAGAAAATTTACGTACCG (forward)                      | BspHI                  |
|                            |                            | CGCGGATCC <b>T</b> ACTTTTAGTAATTTATCTAA (reverse)                    | BamHI                  |
| <i>hpaB<sub>ro-1</sub></i> | BAH50341                   | TTCC <b>CATG</b> ACCACCACCGAAAGCGCACCC (forward)                     | NdeI                   |
|                            |                            | GCGCAAT <b>G</b> CTACTTGTACCGAAGTACGA (reverse)                      | MunI                   |
| <i>hpaB<sub>ro-2</sub></i> | BAH50488                   | TTCC <b>CATG</b> ACCACCACCGAAGCTGCCCCC (forward)                     | NdeI                   |
|                            |                            | GCGCAAT <b>G</b> CTAGCTGCGGCCGAAGTAGGA (reverse)                     | MunI                   |
| <i>hpaB<sub>ro-3</sub></i> | BAH51988                   | TTCC <b>CATG</b> ACCACATCAGCTTTCGTCGAC (forward)                     | NdeI                   |
|                            |                            | GCGCAAT <b>G</b> TCAGCTCCGGACGATCCGCAG (reverse)                     | MunI                   |
| <i>hpaB<sub>ec</sub></i>   | CAQ34705                   | TT <b>CATG</b> AAACCAGAAGATTTCCGCGCCA (forward)                      | BspHI                  |
|                            |                            | CGCGGATCC <b>T</b> TATTT <b>CAG</b> CAGCTTATCCAG (reverse)           | BamHI                  |
| <i>hpaB<sub>pa</sub></i>   | AAG07478                   | TT <b>CATG</b> AAACCCGAAGATTTCCGTGCCT (forward)                      | BspHI                  |
|                            |                            | CGCGGATCC <b>T</b> CATTGGCGGATGCGATCGAG (reverse)                    | BamHI                  |
| <i>hpaC<sub>pa</sub></i>   | AAG07479                   | TTCC <b>CATG</b> TCCCAGCTCGAACCCAGGCAG (forward)                     | NdeI                   |
|                            |                            | TTCGGTAC <b>C</b> TCAGGCCGCCCGGGGGCA (reverse)                       | KpnI                   |

<sup>a</sup> NCBI accession numbers for protein are indicated.

<sup>b</sup> Restriction sites are underlined, and initiation and termination codons indicated in bold.

<sup>c</sup> See Experimental details.

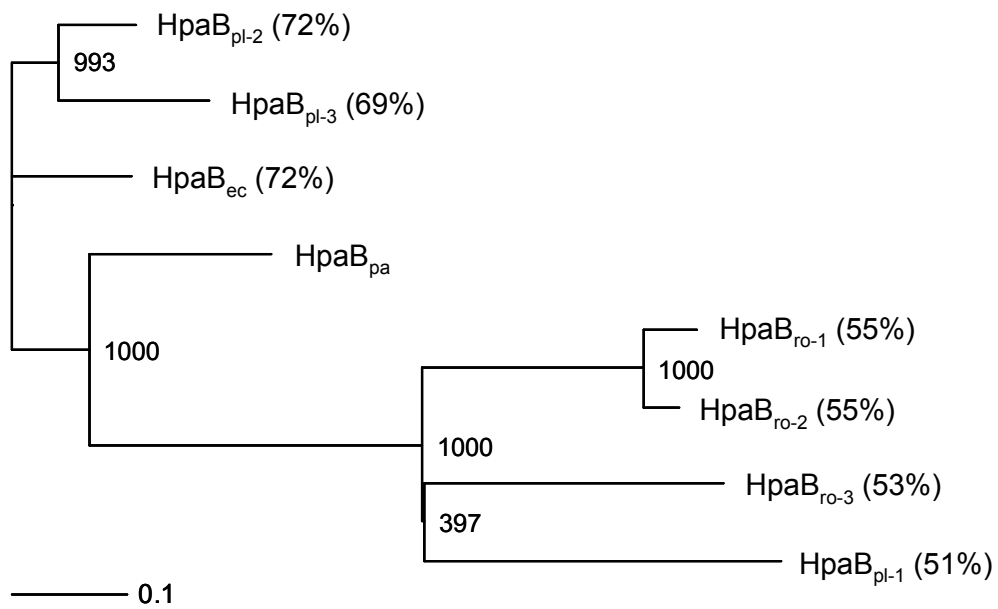

**Fig. S1** Phylogenetic tree of eight HpaB enzymes. The HpaB enzymes analyzed are listed in Table S1. Amino acid identity between HpaB<sub>pa</sub> and other HpaB enzymes are shown in parentheses.

HpaBtt 1 -----MARTGCEYLLEAKTRFPNLLWYKEMFE 27  
HpaBpa 1 -----MKPFEDFRASATRFPTGCEYLLESLCD-DREIYLYGERVK 37  
HpaBec 1 -----MKPFEDFRASATRFPTGCEYLLESLCD-DREIYLYGERVK 37  
HpaBpl-1 1 -----MSENMKQKSSNEGNIRTRRPLTGTGELDQDND-GREIWAYGERFH 44  
HpaBpl-2 1 -----MKPFEDFRADKKRFPPTGCEYLLESLCD-DREIYLYGERVK 37  
HpaBpl-3 1 -----MKPENLRITDNKRFPPTGCEYLLESLCD-DREIYLYGERVK 37  
HpaBro-1 1 MTTTESAPETALDPTKVNPAADCEANRTANFATRFMTGCEYLLESLCD-DREIYLYGERVK 59  
HpaBro-2 1 MTTTEAAPET-VDRTKVNPAADCEANRTANFATRFMTGCEYLLESLCD-DREIYLYGERVK 58  
HpaBro-3 1 -----MTTSAFVDAPVAAPNDVRFMTGCEYLLESLCD-DREIYLYGERVK 43

HpaBtt 28 DVTTHPAFRNPAASIGQLYDALHAFETHDILCWNVDTGSGGVTHERFFRFAISADDLRQR 97  
HpaBpa 38 DVTTHPAFRNPAASIGQLYDALHAFETHDILCWNVDTGSGGVTHERFFRFAISADDLRQR 97  
HpaBec 38 DVTTHPAFRNPAASIGQLYDALHAFETHDILCWNVDTGSGGVTHERFFRFAISADDLRQR 97  
HpaBpl-1 45 DVVTHPAFRNPAASIGQLYDALHAFETHDILCWNVDTGSGGVTHERFFRFAISADDLRQR 104  
HpaBpl-2 38 DVTTHPAFRNPAASIGQLYDALHAFETHDILCWNVDTGSGGVTHERFFRFAISADDLRQR 97  
HpaBpl-3 38 DVTTHPAFRNPAASIGQLYDALHAFETHDILCWNVDTGSGGVTHERFFRFAISADDLRQR 97  
HpaBro-1 60 DVVTHPAFRNPAASIGQLYDALHAFETHDILCWNVDTGSGGVTHERFFRFAISADDLRQR 119  
HpaBro-2 59 DVVTHPAFRNPAASIGQLYDALHAFETHDILCWNVDTGSGGVTHERFFRFAISADDLRQR 118  
HpaBro-3 44 DVVTHPAFRNPAASIGQLYDALHAFETHDILCWNVDTGSGGVTHERFFRFAISADDLRQR 103

HpaBtt 84 GCRYKIMADONLIGMGRSPDYLNAMVVMAYASADYEFEEAENVRNYRYLRDQDEATRA 143  
HpaBpa 98 -DAIAEWSRLTYGWMGRFPDYKAAFGSALGANPGEYGFEDNAKTYKRLQACELLYNHA 156  
HpaBec 98 -DAIAEWSRLTYGWMGRFPDYKAAFGSALGANPGEYGFEDNAKTYKRLQACELLYNHA 156  
HpaBpl-1 105 -DAIAEWSRLTYGWMGRFPDYKAAFGSALGANPGEYGFEDNAKTYKRLQACELLYNHA 163  
HpaBpl-2 98 -DAIAEWSRLTYGWMGRFPDYKAAFGSALGANPGEYGFEDNAKTYKRLQACELLYNHA 156  
HpaBpl-3 98 -DAIAEWSRLTYGWMGRFPDYKAAFGSALGANPGEYGFEDNAKTYKRLQACELLYNHA 156  
HpaBro-1 120 -DAIAEWSRLTYGWMGRSPDYKAAFGSALGANPGEYGFEDNAKTYKRLQACELLYNHA 178  
HpaBro-2 119 -DAIAEWSRLTYGWMGRSPDYKAAFGSALGANPGEYGFEDNAKTYKRLQACELLYNHA 177  
HpaBro-3 104 -DAIAEWSRLTYGWMGRSPDYKAAFGSALGANPGEYGFEDNAKTYKRLQACELLYNHA 162

HpaBtt 144 IINPPIDRRKLPDEIDVDFIQLF--KETDAGLIIVSGAKVVATNSALTHYNFIC-FGSAQL 200  
HpaBpa 157 IINPPIDRRKLPDEIDVDFIQLF--KETDAGLIIVSGAKVVATNSALTHYNFIC-FGSAQL 213  
HpaBec 157 IINPPIDRRKLPDEIDVDFIQLF--KETDAGLIIVSGAKVVATNSALTHYNFIC-FGSAQL 213  
HpaBpl-1 164 IINPPIDRRKLPDEIDVDFIQLF--KETDAGLIIVSGAKVVATNSALTHYNFIC-FGSAQL 219  
HpaBpl-2 157 IINPPIDRRKLPDEIDVDFIQLF--KETDAGLIIVSGAKVVATNSALTHYNFIC-FGSAQL 213  
HpaBpl-3 157 IINPPIDRRKLPDEIDVDFIQLF--KETDAGLIIVSGAKVVATNSALTHYNFIC-FGSAQL 212  
HpaBro-1 179 IINPPIDRRKLPDEIDVDFIQLF--KETDAGLIIVSGAKVVATNSALTHYNFIC-FGSAQL 234  
HpaBro-2 178 IINPPIDRRKLPDEIDVDFIQLF--KETDAGLIIVSGAKVVATNSALTHYNFIC-FGSAQL 233  
HpaBro-3 163 IINPPIDRRKLPDEIDVDFIQLF--KETDAGLIIVSGAKVVATNSALTHYNFIC-FGSAQL 218

HpaBtt 201 QAGSEKYALFRLTSTFGLHFVCREA--LVGQ--LSPFFLPLSSRFENDAILLMDKVL 256  
HpaBpa 214 LGDNTDFALMFAIPMNTFGKLISSSYELVAGIAGSPFDYPLSSRFENDAILLMDKVL 273  
HpaBec 214 MGENPDFALMFAIPMNTFGKLISSSYELVAGIAGSPFDYPLSSRFENDAILLMDKVL 273  
HpaBpl-1 220 I-KKRFALICTVPMDDAPGVKLISSSYELVAGIAGSPFDYPLSSRFENDAILLMDKVL 278  
HpaBpl-2 214 MGDNPDFALMFAIPMNTFGKLISSSYELVAGIAGSPFDYPLSSRFENDAILLMDKVL 273  
HpaBpl-3 213 IGDNPDFALMFAIPMNTFGKLISSSYELVAGIAGSPFDYPLSSRFENDAILLMDKVL 272  
HpaBro-1 235 I-KKRFALICTVPMDDAPGVKLISSSYELVAGIAGSPFDYPLSSRFENDAILLMDKVL 293  
HpaBro-2 234 I-KKRFALICTVPMDDAPGVKLISSSYELVAGIAGSPFDYPLSSRFENDAILLMDKVL 292  
HpaBro-3 219 L-RKKKEYGLICTVPMDDAPGVKLISSSYELVAGIAGSPFDYPLSSRFENDAILLMDKVL 277

HpaBtt 257 VPWENVEFLGMVBLCNNAYAATGALNHMA-HQVVALKTAETAEPLGVAAAM-A-AGTAD 313  
HpaBpa 274 IPWENVEFLGMVBLCNNAYAATGALNHMA-HQVVALKTAETAEPLGVAAAM-A-AGTAD 330  
HpaBec 274 IPWENVEFLGMVBLCNNAYAATGALNHMA-HQVVALKTAETAEPLGVAAAM-A-AGTAD 330  
HpaBpl-1 279 VPWENVEFLGMVBLCNNAYAATGALNHMA-HQVVALKTAETAEPLGVAAAM-A-AGTAD 335  
HpaBpl-2 274 IPWENVEFLGMVBLCNNAYAATGALNHMA-HQVVALKTAETAEPLGVAAAM-A-AGTAD 330  
HpaBpl-3 273 IPWENVEFLGMVBLCNNAYAATGALNHMA-HQVVALKTAETAEPLGVAAAM-A-AGTAD 329  
HpaBro-1 294 VPWENVEFLGMVBLCNNAYAATGALNHMA-HQVVALKTAETAEPLGVAAAM-A-AGTAD 350  
HpaBro-2 293 VPWENVEFLGMVBLCNNAYAATGALNHMA-HQVVALKTAETAEPLGVAAAM-A-AGTAD 349  
HpaBro-3 278 VPWENVEFLGMVBLCNNAYAATGALNHMA-HQVVALKTAETAEPLGVAAAM-A-AGTAD 333

HpaBtt 314 VY-ENVEFLGMVBLCNNAYAATGALNHMA-HQVVALKTAETAEPLGVAAAM-A-AGTAD 368  
HpaBpa 331 EFRG-VQADLGEVWAM-RNL--FWSLTDAMWAEAKPWECSGAYMEDTQ-AICTYHVMABTA 385  
HpaBec 331 EFRG-VQADLGEVWAM-RNL--FWSLTDAMWAEAKPWECSGAYMEDTQ-AICTYHVMABTA 385  
HpaBpl-1 336 EFRG-VQADLGEVWAM-RNL--FWSLTDAMWAEAKPWECSGAYMEDTQ-AICTYHVMABTA 390  
HpaBpl-2 331 EFRG-VQADLGEVWAM-RNL--FWSLTDAMWAEAKPWECSGAYMEDTQ-AICTYHVMABTA 385  
HpaBpl-3 330 EFRG-VQADLGEVWAM-RNL--FWSLTDAMWAEAKPWECSGAYMEDTQ-AICTYHVMABTA 384  
HpaBro-1 351 EFRG-VQADLGEVWAM-RNL--FWSLTDAMWAEAKPWECSGAYMEDTQ-AICTYHVMABTA 405  
HpaBro-2 350 EFRG-VQADLGEVWAM-RNL--FWSLTDAMWAEAKPWECSGAYMEDTQ-AICTYHVMABTA 404  
HpaBro-3 334 EFRG-VQADLGEVWAM-RNL--FWSLTDAMWAEAKPWECSGAYMEDTQ-AICTYHVMABTA 388

HpaBtt 369 YPRIKETIEEDVPSGLIYLPSARDFKSDVRFYLDKYVRGSGCMFAVERVKIMKALMDS 425  
HpaBpa 386 YPRIKETIEEDVPSGLIYLPSARDFKSDVRFYLDKYVRGSGCMFAVERVKIMKALMDS 445  
HpaBec 386 YPRIKETIEEDVPSGLIYLPSARDFKSDVRFYLDKYVRGSGCMFAVERVKIMKALMDS 445  
HpaBpl-1 391 YPRIKETIEEDVPSGLIYLPSARDFKSDVRFYLDKYVRGSGCMFAVERVKIMKALMDS 450  
HpaBpl-2 386 YPRIKETIEEDVPSGLIYLPSARDFKSDVRFYLDKYVRGSGCMFAVERVKIMKALMDS 445  
HpaBpl-3 385 YPRIKETIEEDVPSGLIYLPSARDFKSDVRFYLDKYVRGSGCMFAVERVKIMKALMDS 444  
HpaBro-1 406 YPRIKETIEEDVPSGLIYLPSARDFKSDVRFYLDKYVRGSGCMFAVERVKIMKALMDS 465  
HpaBro-2 405 YPRIKETIEEDVPSGLIYLPSARDFKSDVRFYLDKYVRGSGCMFAVERVKIMKALMDS 464  
HpaBro-3 389 YPRIKETIEEDVPSGLIYLPSARDFKSDVRFYLDKYVRGSGCMFAVERVKIMKALMDS 448

HpaBtt 426 TISFGARFELYEYEFH--DHYRMYDIT--YVYVYKPEYKERTAFLESKVFEEVQA-- 481  
HpaBpa 446 TISFGARFELYEYEFH--DHYRMYDIT--YVYVYKPEYKERTAFLESKVFEEVQA-- 502  
HpaBec 446 TISFGARFELYEYEFH--DHYRMYDIT--YVYVYKPEYKERTAFLESKVFEEVQA-- 502  
HpaBpl-1 451 TISFGARFELYEYEFH--DHYRMYDIT--YVYVYKPEYKERTAFLESKVFEEVQA-- 507  
HpaBpl-2 446 TISFGARFELYEYEFH--DHYRMYDIT--YVYVYKPEYKERTAFLESKVFEEVQA-- 502  
HpaBpl-3 445 TISFGARFELYEYEFH--DHYRMYDIT--YVYVYKPEYKERTAFLESKVFEEVQA-- 501  
HpaBro-1 466 TISFGARFELYEYEFH--DHYRMYDIT--YVYVYKPEYKERTAFLESKVFEEVQA-- 522  
HpaBro-2 465 TISFGARFELYEYEFH--DHYRMYDIT--YVYVYKPEYKERTAFLESKVFEEVQA-- 521  
HpaBro-3 449 TISFGARFELYEYEFH--DHYRMYDIT--YVYVYKPEYKERTAFLESKVFEEVQA-- 505

HpaBtt 481 ----- 481  
HpaBpa 503 VEDLVGNDVSYFGNK-- 520  
HpaBec 503 VEDLVGNDVSYFGNK-- 520  
HpaBpl-1 508 GNDVSYFGNK-- 517  
HpaBpl-2 503 VEDLVGNDVSYFGNK-- 520  
HpaBpl-3 502 VEDLVGNDVSYFGNK-- 519  
HpaBro-1 523 VEDLVGNDVSYFGNK-- 538  
HpaBro-2 522 VEDLVGNDVSYFGNK-- 537  
HpaBro-3 506 VEDLVGNDVSYFGNK-- 520



**Fig. S2** Multiple sequence alignment of HpaB enzymes. The HpaB enzymes analyzed are listed in Table S1. HpaB<sub>tt</sub>, HpaB form *Thermus thermophilus* HB8 (NCBI accession number BAD70783). Asterisks indicate the residues that are involved in substrate binding in HpaB<sub>tt</sub>.

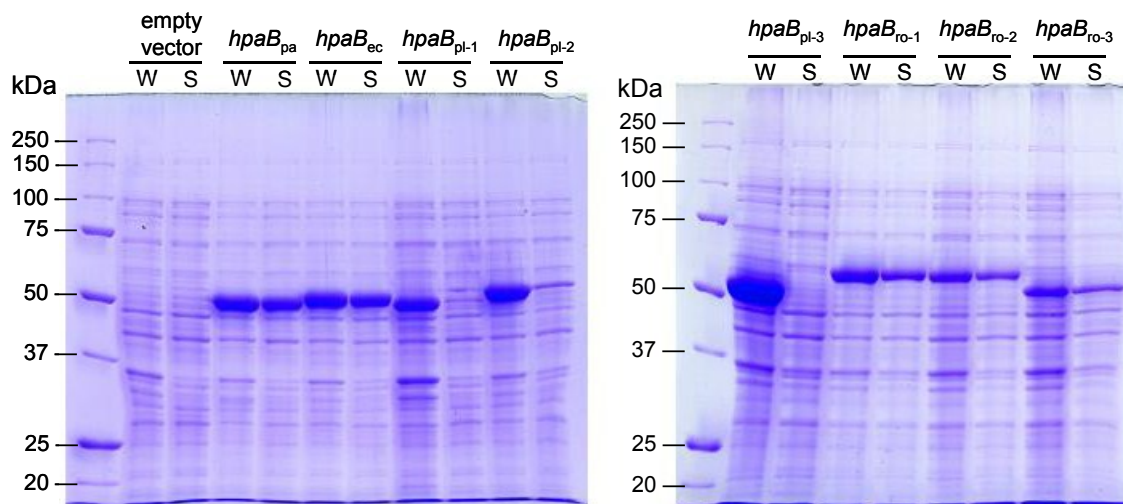

**Fig. S3** SDS-PAGE analysis of expression of HpaB enzymes in *E. coli*. Samples prepared from *E. coli* cells carrying the empty vector or respective *hpaB* gene were loaded onto a polyacrylamide gel. W, whole-cell sample; S, soluble-fraction sample.

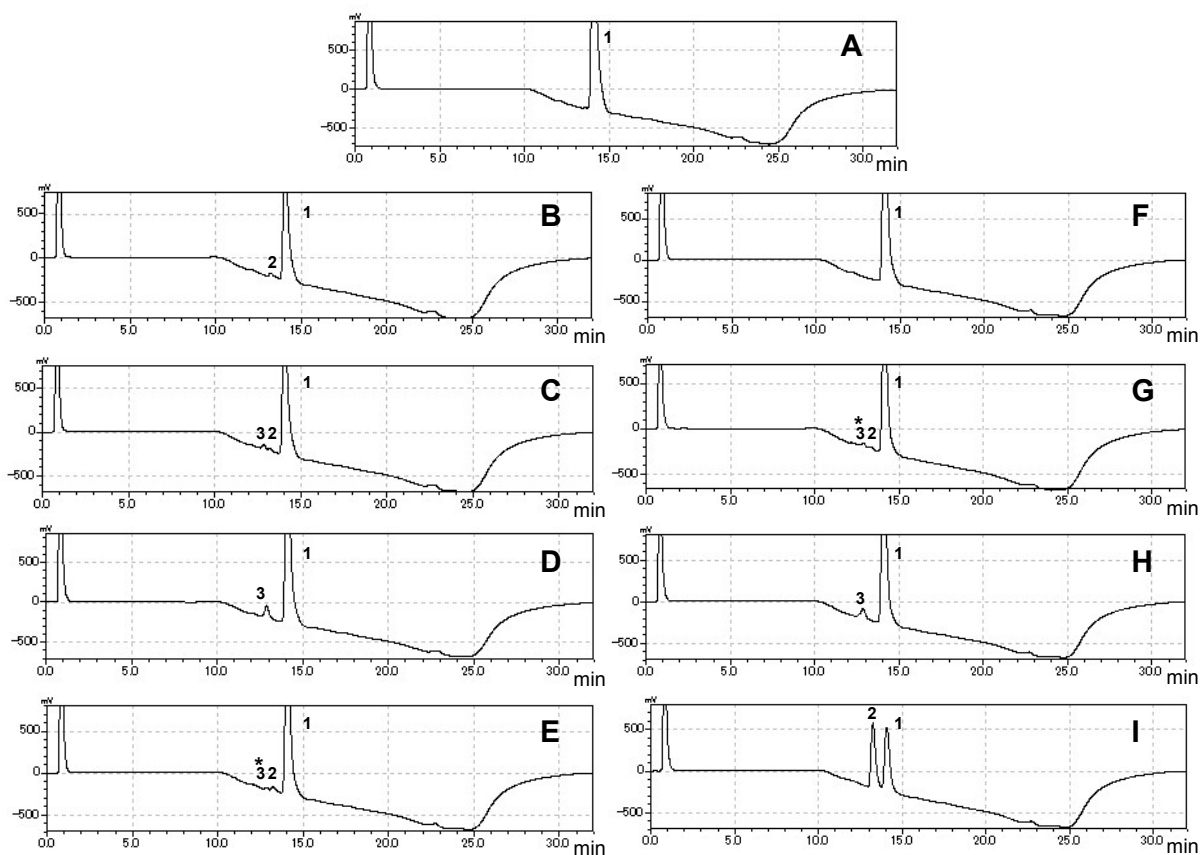

**Fig S4** HPLC analysis of reactions of HpaB enzymes with (*S*)-equol. *E. coli* cells carrying the empty vector (A), *hpaB*<sub>pa</sub> (B), *hpaB*<sub>ec</sub> (C), *hpaB*<sub>pl-1</sub> (D), *hpaB*<sub>pl-2</sub> (E), *hpaB*<sub>pl-3</sub> (F), *hpaB*<sub>ro-1</sub> (G), *hpaB*<sub>ro-2</sub> (H), or *hpaB*<sub>ro-3</sub> (I) were incubated with (*S*)-equol. Peaks 1 (at 14.0 min), 2 (at 13.2 min), and 3 (at 12.8 min) were found to correspond to (*S*)-equol, (*S*)-3'-hydroxyequol, and (*S*)-6-hydroxyequol, respectively. Peaks marked with asterisks were occasionally not detected.

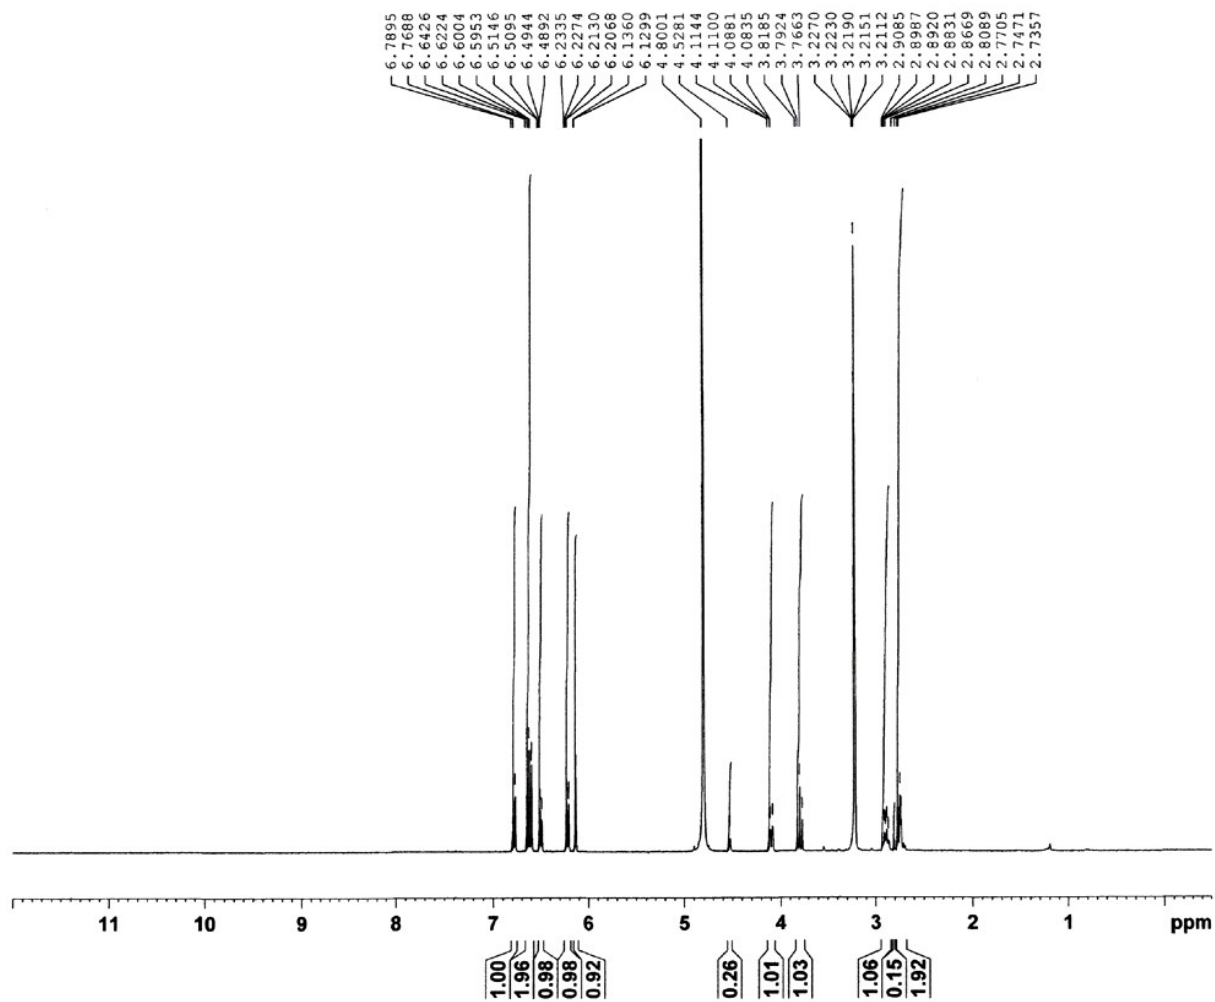

**Fig. S5**  $^1\text{H}$  NMR spectrum of the reaction product 3'-hydroxyequol.

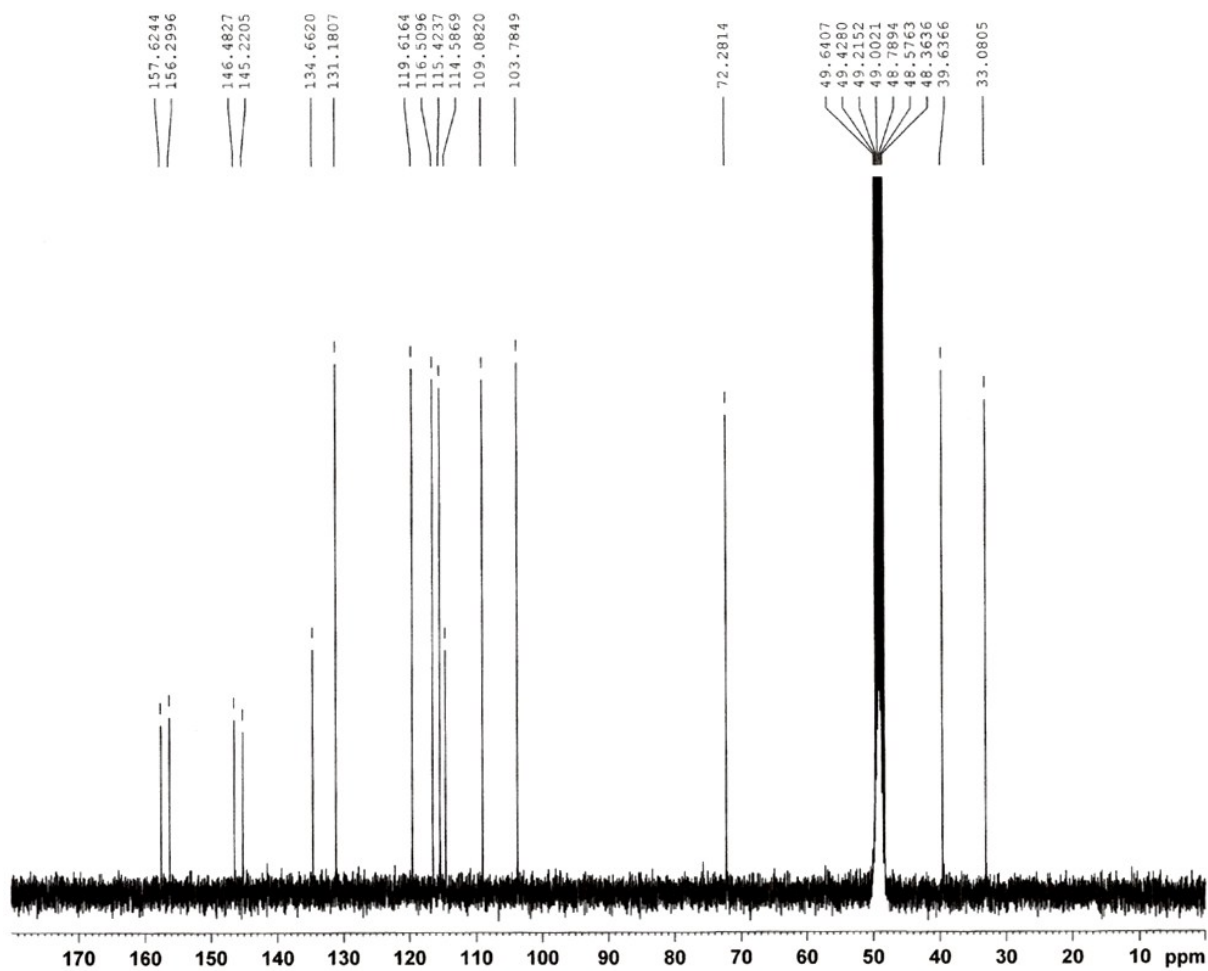

**Fig. S6** <sup>13</sup>C NMR spectrum of the reaction product 3'-hydroxyequol.

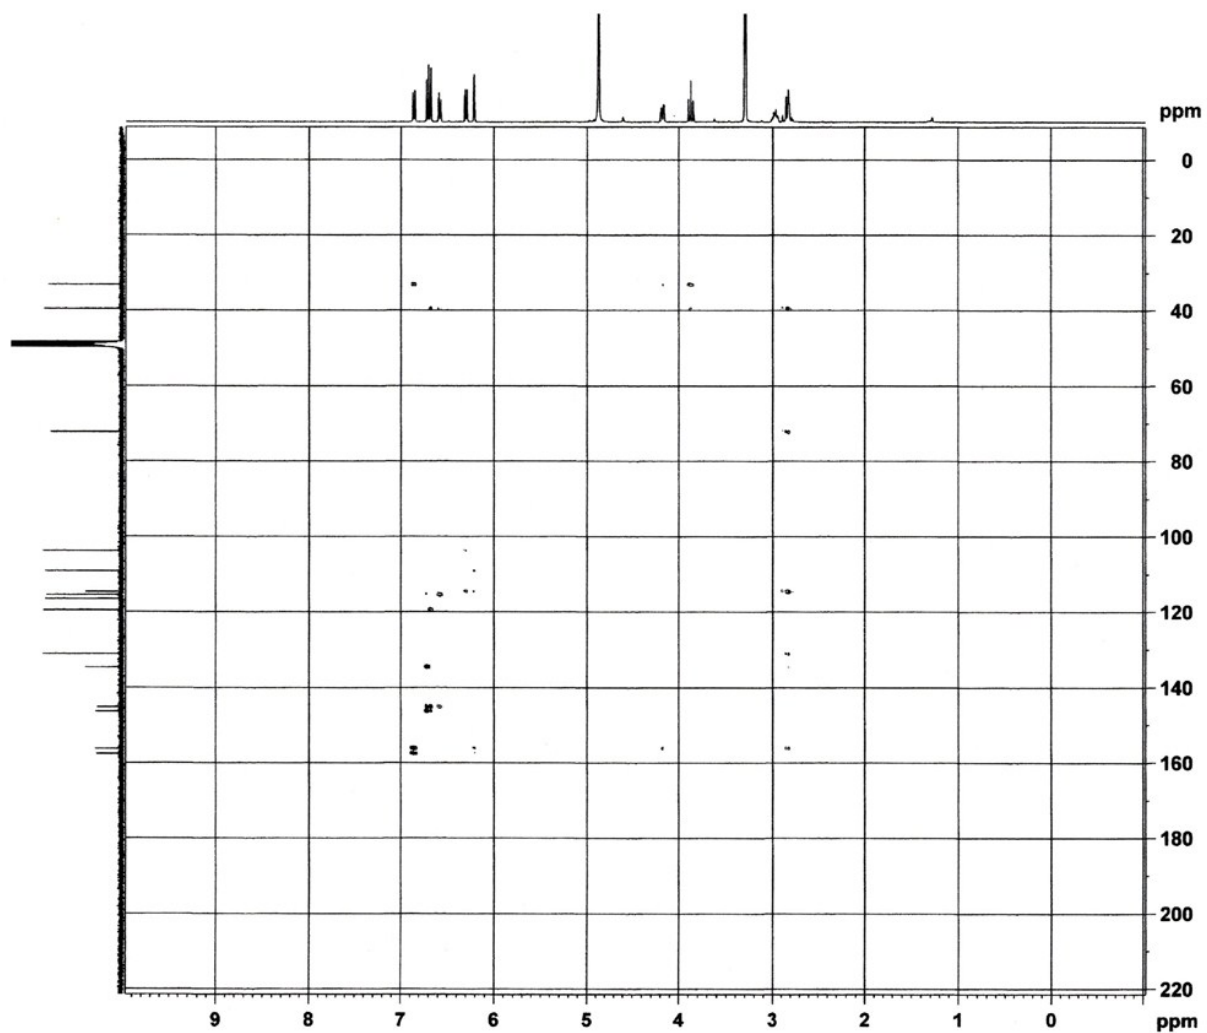

Fig. S7 HMBC spectrum of the reaction product 3'-hydroxyequol.

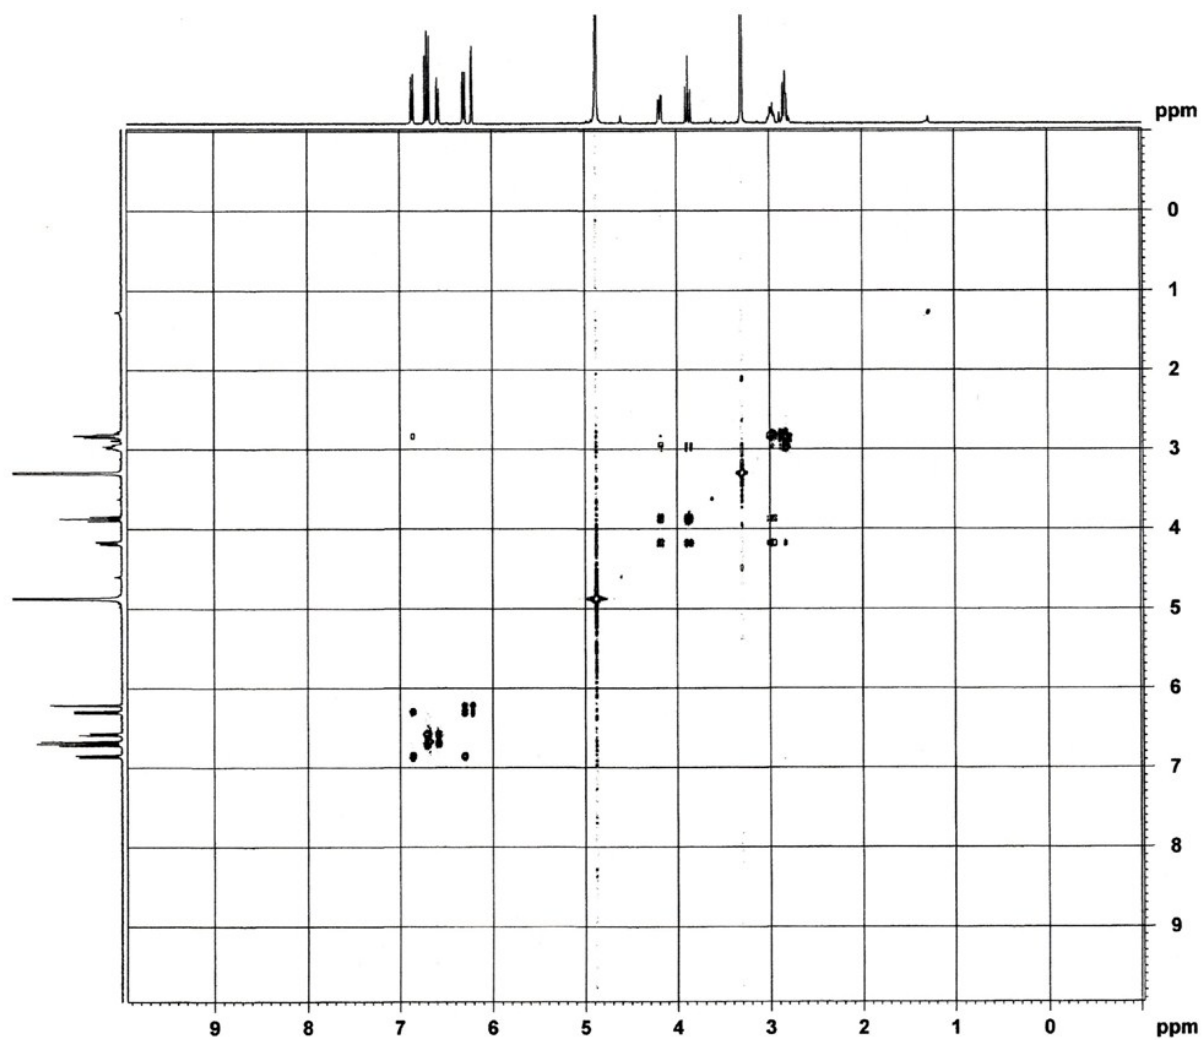

Fig. S8 COSY spectrum of the reaction product 3'-hydroxyequol.

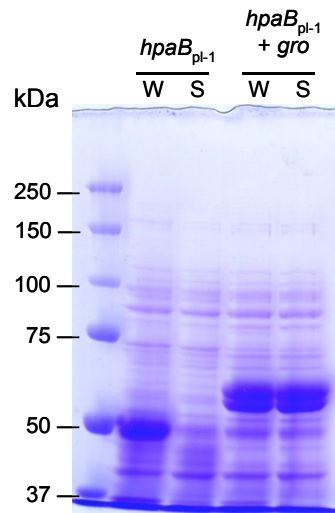

**Fig. S9** SDS-PAGE analysis of expression of HpaB<sub>pl-1</sub> in *E. coli*. Samples prepared from *E. coli* cells carrying  $hpaB_{pl-1}$  or  $hpaB_{pl-1}$  and pGro7 were loaded onto a polyacrylamide gel. W, whole-cell sample; S, soluble-fraction sample.





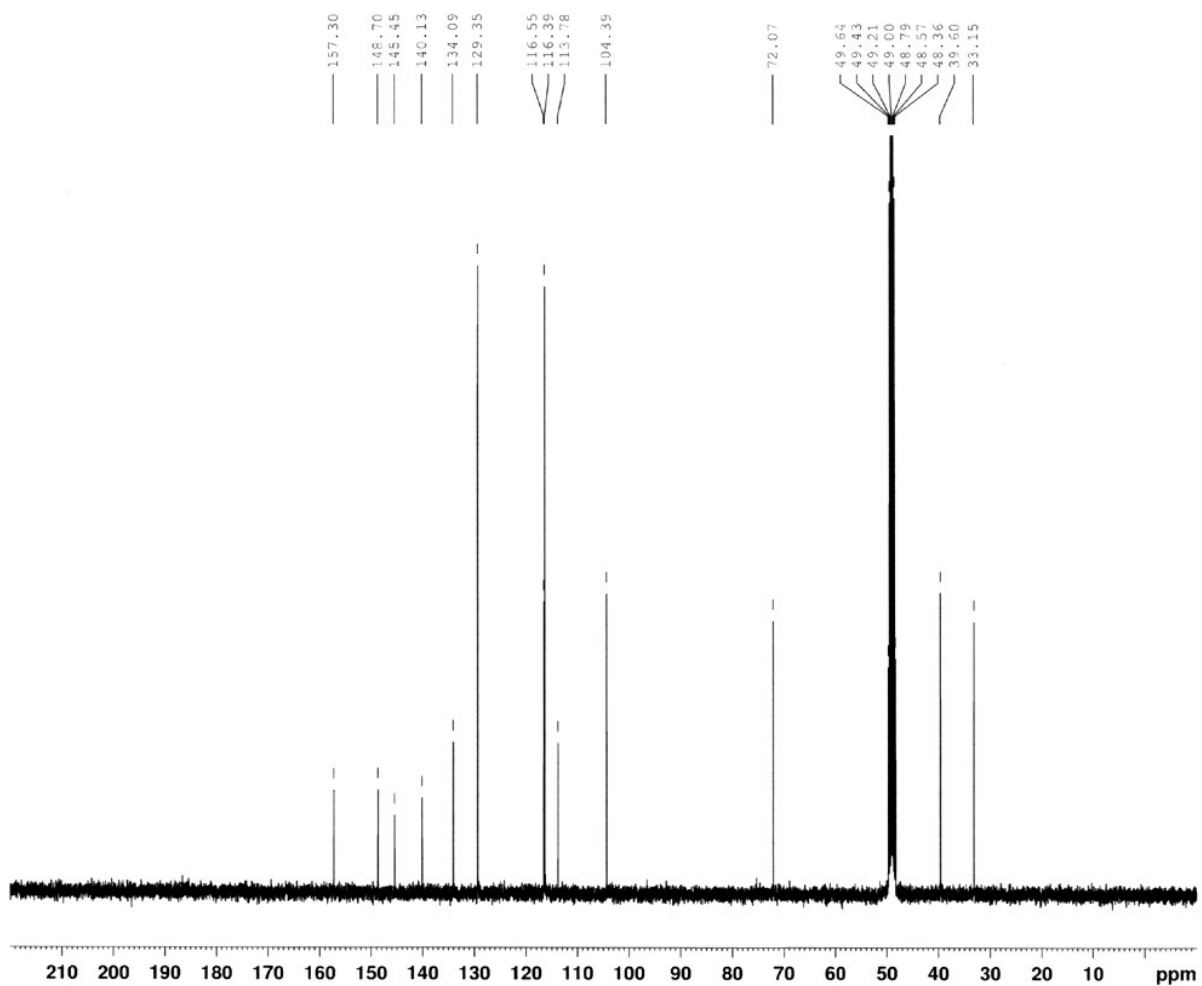

**Fig. S11**  $^{13}\text{C}$  NMR spectrum of the reaction product 6-hydroxyequeol.

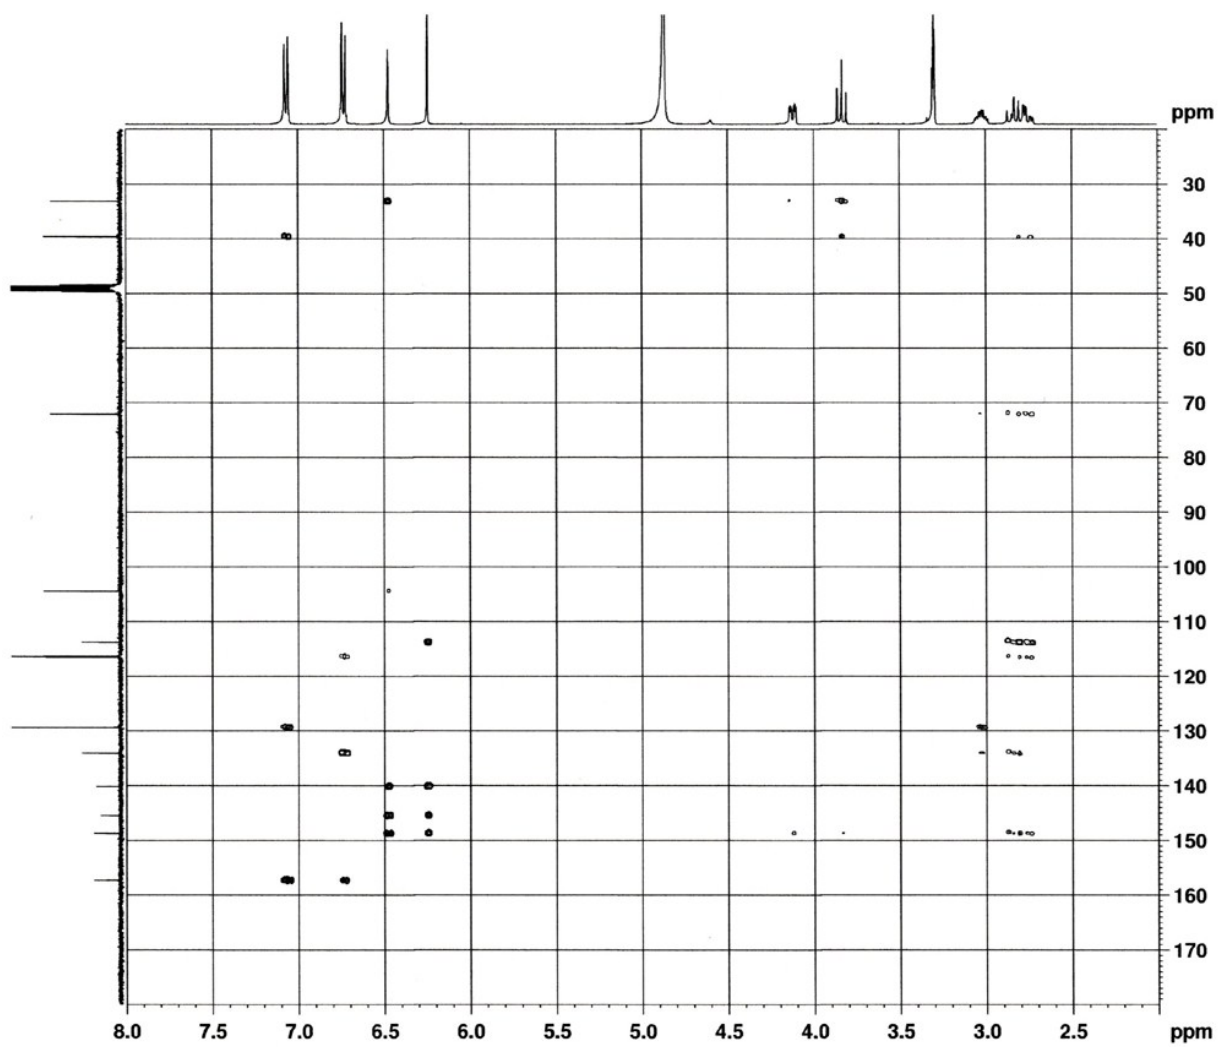

**Fig. S12** HMBC spectrum of the reaction product 6-hydroxyequol.

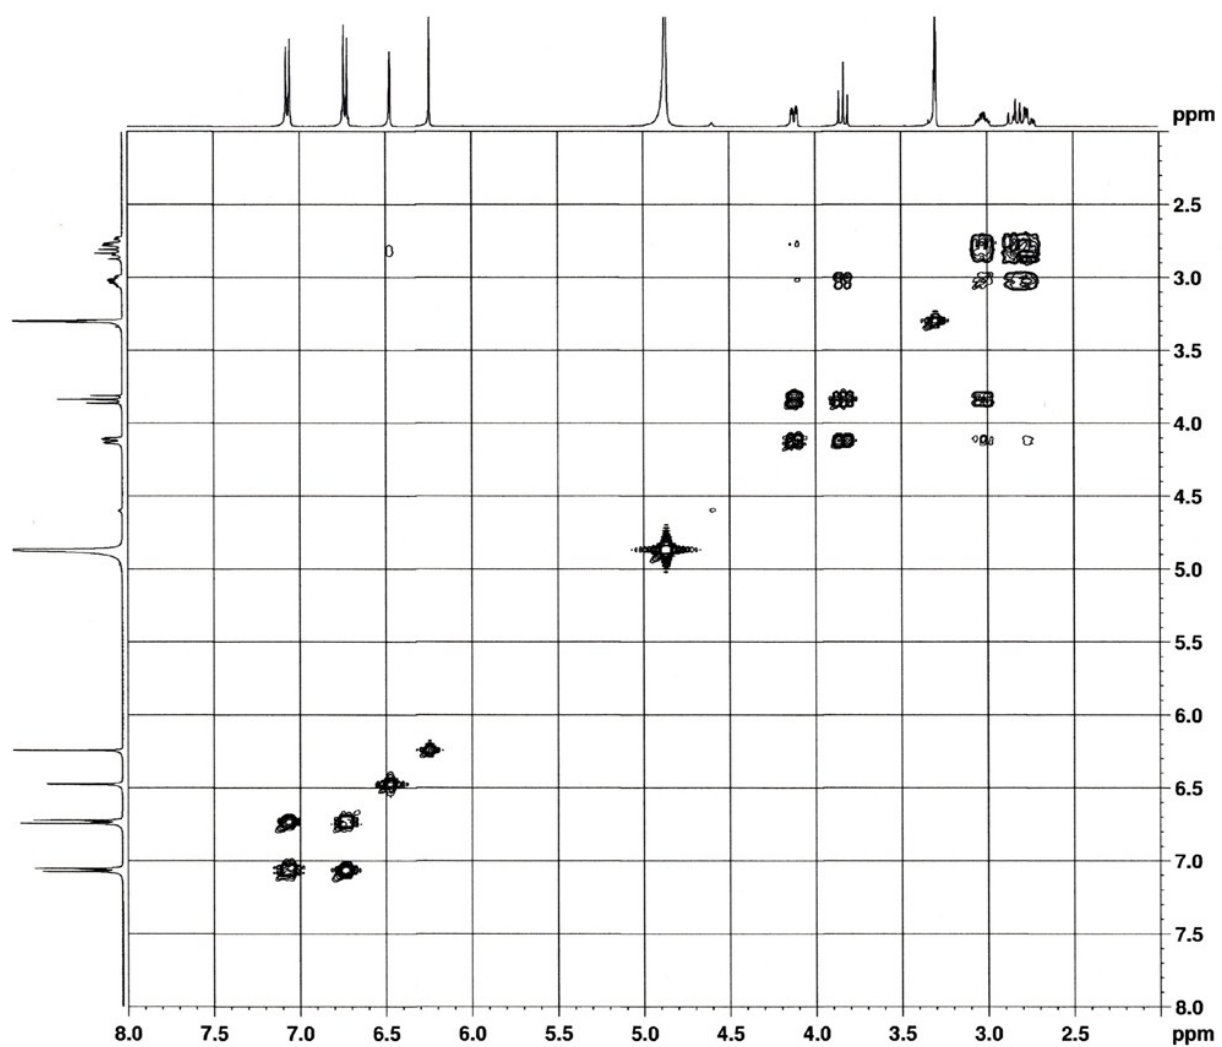

**Fig. S13** COSY spectrum of the reaction product 6-hydroxyequol.
